# Supplementary material for: Super-robust superhydrophobic concrete
Source: Royal Society of Chemistry journal article supplement (doi:10.1039/c7ta03526h), 2017-01-01
Supplement: c7ta03526h1.pdf [file c7ta03526h1.pdf]

## Supplementary Materials

### Super-Robust Superhydrophobic Concrete

Jinlong Song <sup>a, b</sup>, Danyang Zhao <sup>a, b\*</sup>, Zhengjin Han <sup>a</sup>, Wei Xu <sup>c</sup>, Yao Lu <sup>d</sup>, Xin Liu <sup>a</sup>, Bo Liu <sup>c</sup>, Claire J. Carmalt <sup>d</sup>,  
Xu Deng <sup>e</sup>, Ivan P. Parkin <sup>d\*</sup>

<sup>a</sup> Key Laboratory for Precision and Non-Traditional Machining Technology of Ministry of Education, Dalian  
University of Technology, Dalian 116024, China

<sup>b</sup> Collaborative Innovation Center of Major Machine Manufacturing in Liaoning, Dalian University of Technology,  
Dalian 116024, China

<sup>c</sup> School of Mechanics and Civil Engineering, China University of Mining and Technology (Beijing), 100083,  
China

<sup>d</sup> Department of Chemistry, University College London, 20 Gordon Street, London, WC1H 0AJ, UK

<sup>e</sup> Institute of Fundamental and Frontier Sciences, University of Electronic Science and Technology of China,  
Chengdu 610054, P. R. China

\*Corresponding author: Prof. DY Zhao (zhaody@dlut.edu.cn) and Prof. IP Parkin (i.p.parkin@ucl.ac.uk).

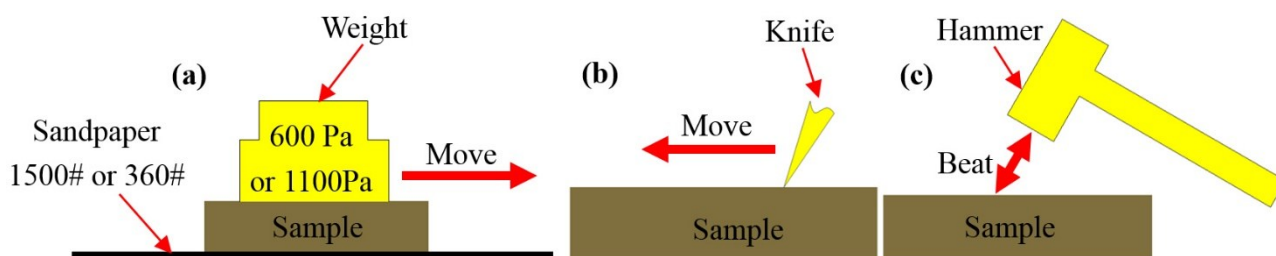

**Figure S1** Mechanical robustness test. (a) Sandpaper abrasion: the samples were placed face-down to the sandpaper (sandpaper of 1500# and 360#) and abraded under certain pressure (600 Pa and 1100 Pa). (b) Knife scratch: the move direction of the knife was perpendicular with the knife edge. (c) Hammer beat: a hammer was used to continuously beat the S-concrete to further show the super-robustness of the S-concrete.

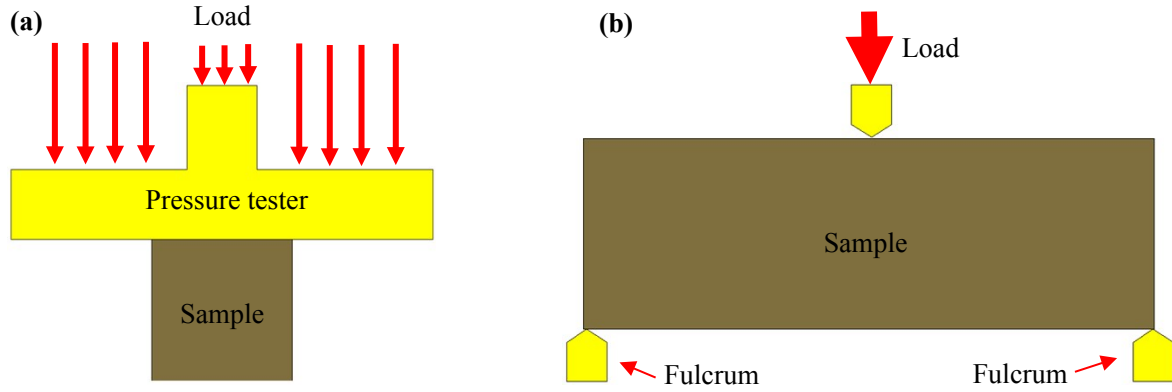

**Figure S2** Schematic of the compressive strength and flexural strength test: (a) compressive strength test and (b) flexural strength test.

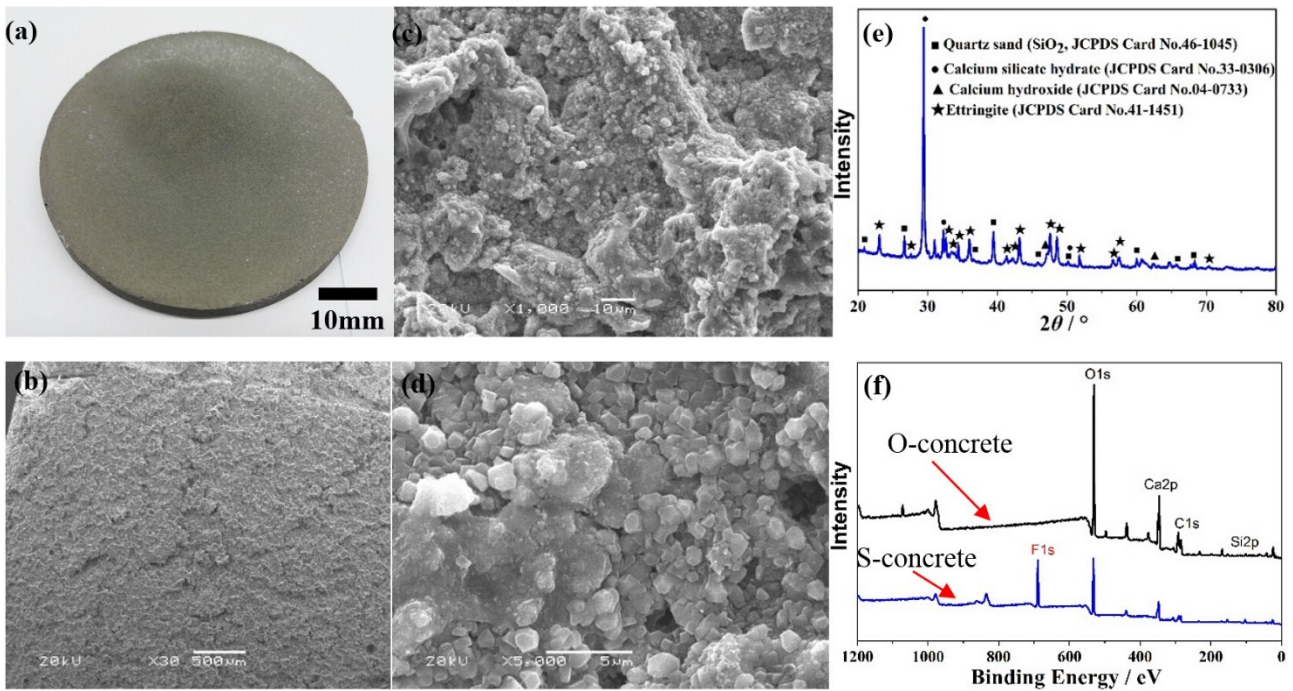

**Figure S3** Surface morphology and chemical composition of the O-concrete. (a)-(d) SEM images with different magnifications. There was no sub-millimeter structures but exist micro/nano-meter scale particles on the O-concrete. (e) XRD pattern. The main composition of the O-concrete is quartz sand, calcium silicate hydrate, calcium hydroxide and ettringite. (f) XPS spectra. The peaks from F is not detected on the O-concrete but detected on the S-concrete, meaning the particles of the S-concrete were successfully coated with FAS.

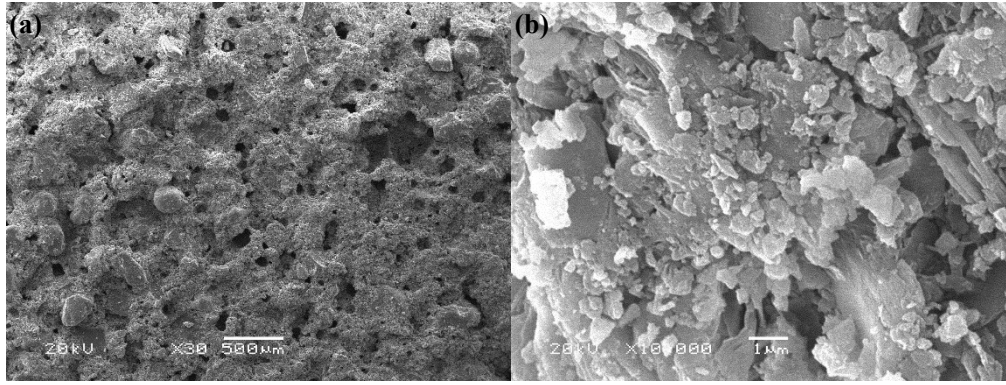

**Figure S4** SEM images of S-concrete after abrasion on the standard sandpaper of 1500# at the pressure of 600 Pa for 6 m. The surface was still rather rough than O-concrete.

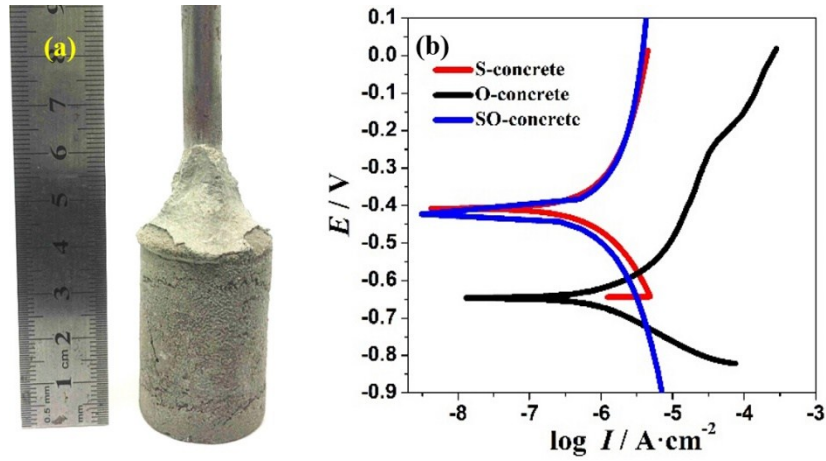

**Figure S5** Anti-corrosion test of double layer concrete composed of S-concrete and O-concrete (SO-concrete). The thickness of the S-concrete and O-concrete was 5 mm, respectively. (a) Sample of carbon steel bar coated with the SO-concrete. (b) The potentiodynamic polarization curves of the carbon steel bars coated with concrete in the 3.5 wt % NaCl aqueous solution. The corrosion potential and corrosion current density of carbon steel coated with the SO-concrete were -0.42V and  $4.31 \times 10^{-6}$  A/cm<sup>2</sup>. Before the corrosion, all the samples were immersed in the 3.5 wt% aqueous NaCl solutions for 24 h.

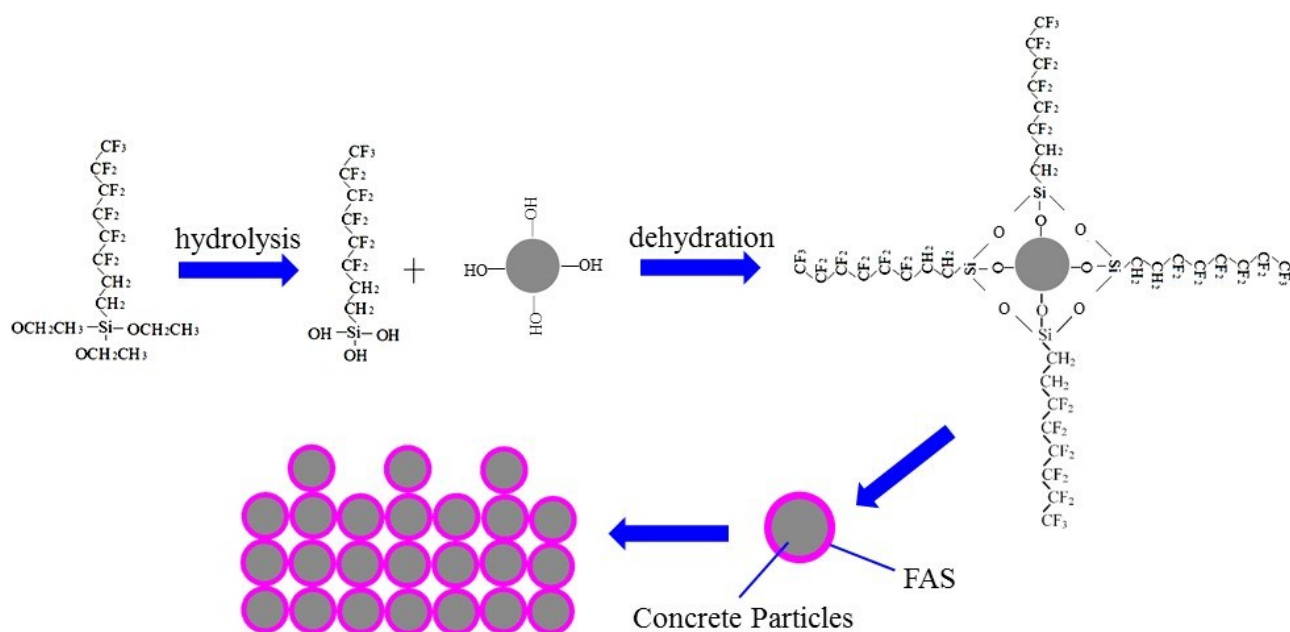

**Figure S6** Formation scheme of the self-assembled FAS film on concrete.

**Video S1.** Dynamic bouncing processes of a 9.5  $\mu\text{L}$  water droplet on the horizontal and sloping S-concrete from a height of 30 mm.

**Video S2.** Linear abrasion processes of the S-concrete on the 360# sandpaper under 1100 Pa. The S-concrete was still superhydrophobic after abrasion for 8 m.

**Video S3.** Knife scratch of the S-coating and S-concrete. Although the adhesive can improve the mechanical durability of the S-coating, when the move direction of the knife was perpendicular with the knife edge, the S-coating was easily destroyed by knife. However, after same knife scratch, the S-concrete was still superhydrophobic.

**Video S4.** Hammer beat processes of the S-concrete. After hammer beat, the S-concrete was still superhydrophobic.

**Video S5.** Anti-icing processes of the sloping S-concrete. Chamber temperature:  $-5\text{ }^{\circ}\text{C}$ ; rain temperature:  $2.5\text{ }^{\circ}\text{C}$ ; rain droplet:  $13\text{ }\mu\text{L}$ ; impact velocity with concrete:  $1\text{ m/s}$ ; rainfall:  $3000\text{ }\mu\text{L/min}$ ; tilting angle of concrete:  $30^{\circ}$ .

**Video S6.** Deicing force measurement of the horizontal concrete. For an ice cube with ice-concrete contact area of  $1.5\text{ m}^2$ , the deicing force was 336.8 N for the O-concrete and 25.5 N for the S-concrete.

**Video S7.** Self-cleaning processes of the S-concrete.  $\text{CaCO}_3$  powder was used as dirt and placed onto the S-concrete. Water was then dropped to remove the dirt from the S-concrete.
